# Supplementary material for: Elucidating the nonproductive adsorption mechanism of cellulase with lignin fractions from hydrothermally pretreated poplar using multi-dimensional spectroscopic technologies
Source: Royal Society of Chemistry journal article supplement (doi:10.1039/d3gc00907f), 2023-01-01
Supplement: d3gc00907f1.pdf [file d3gc00907f1.pdf]

## ***Elucidating non-productive adsorption mechanism of cellulase with lignin fractions from hydrothermally pretreated poplar using multi-dimensional spectroscopic technologies***

### ***1. Stern-Volmer equation***

Quenching of fluorescence for SL and RL on cellulase was fitted following the Stern-Volmer<sup>1,2</sup>:

$$F_0/F = 1 + K_{SV}[Q] \text{ (Equation S1)}$$

Where  $F_0$  and  $F$  represented the fluorescence intensity of cellulase and cellulase-SL/RL;  $K_{SV}$  and  $[Q]$  represented the dynamic quenching constant and the lignin's total concentration, respectively.

### ***2. Calculating the binding parameters by FLS***

To further study the interaction between SL/RL and cellulase, a double logarithmic formula was used to calculate the apparent binding constant<sup>2</sup>.

$$\lg [(F_0 - F)/F] = \lg K + n \lg [Q] \text{ (Equation S2)}$$

where  $F_0$  and  $F$  are the cellulase fluorescence intensities in the absence and presence of quencher (e.g., lignin), respectively;  $K_a$  is the binding constant;  $n$  is the number of binding sites;  $[Q]$  is the concentration of quencher (e.g., lignin).

### ***3. Thermodynamics parameters***

The van't Hoff and Gibbs-Helmholtz equations might be used to calculate the value of  $\Delta G$  as well as the value of  $\Delta S$  in the case of constant  $\Delta H$ <sup>3</sup>:

$$\ln \left( \frac{K_2}{K_1} \right) = \frac{\Delta H}{R} \cdot \left( \frac{1}{T_1} - \frac{1}{T_2} \right) \text{ (Equation S3)}$$

$$\Delta G = \Delta H - T \cdot \Delta S \text{ (Equation S4)}$$

$$\Delta G = -RT \cdot \ln K \text{ (Equation S5)}$$

Where  $K_1$  and  $K_2$  ( $L \cdot mol^{-1}$ ) represented the binding constants related to temperature  $T_1$  and  $T_2$ ;  $T$  was the absolute temperature, and  $R$  was the gas constant;  $\Delta H$  ( $kJ \cdot mol^{-1}$ ) and  $\Delta S$

( $\text{J}\cdot\text{mol}^{-1}\cdot\text{K}^{-1}$ ) was the enthalpy change and entropy of the reaction system.

The interaction between lignin and cellulase is influenced by several forces, including hydrogen bonding, van der Waals forces, electrostatic interactions, and hydrophobic interactions. These forces are difficult to quantify individually and can be affected by several factors, such as temperature, pH, and ionic strength. In the process of lignin and cellulase interactions,  $\Delta H$  and  $\Delta S$  values can provide insights into the relative contribution of different forces to the overall interaction. For example, if the interaction between lignin and cellulase is primarily driven by hydrogen bonding, the  $\Delta H$  value will be negative, indicating that energy is released during the formation of the bond. The  $\Delta S$  value will be negative, indicating that the system becomes more ordered during the interaction. In contrast, if the interaction is driven by hydrophobic forces, the  $\Delta H$  value will be positive, indicating that energy is required to disrupt the interactions, and the  $\Delta S$  value will be positive, indicating that the system becomes more disordered during the interaction.<sup>4</sup> According to Ross's theory,<sup>3</sup> the major binding forces could be implied from the values of the  $\Delta S$  and  $\Delta H$ . When  $\Delta S > 0$ , it is mainly manifested as hydrophobic and electrostatic forces; when  $\Delta S < 0$ , it is mainly hydrogen bonds and van der Waals forces; when  $\Delta H > 0$  and  $\Delta S > 0$ , it is mainly typical hydrophobic forces; when  $\Delta H < 0$  and  $\Delta S < 0$ , it is mainly hydrogen bonds and van der Waals forces.

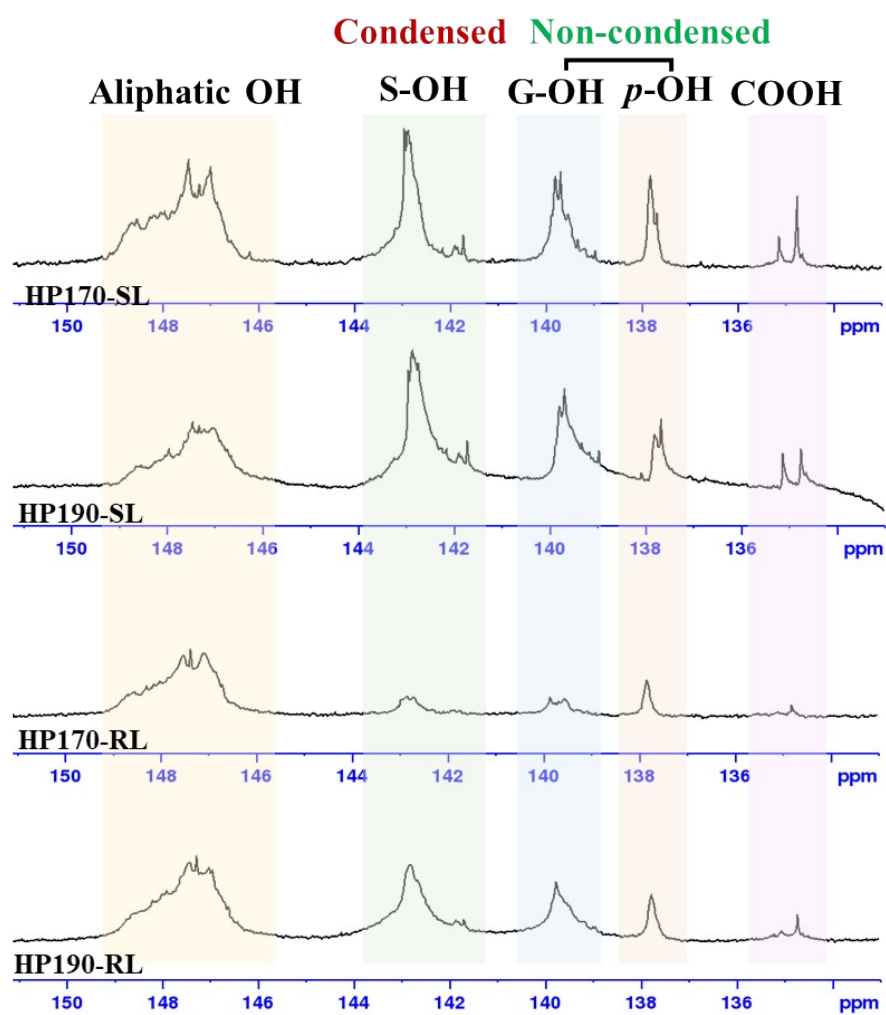

Figure S1  $^{31}\text{P}$  NMR spectra from the SL and RL.

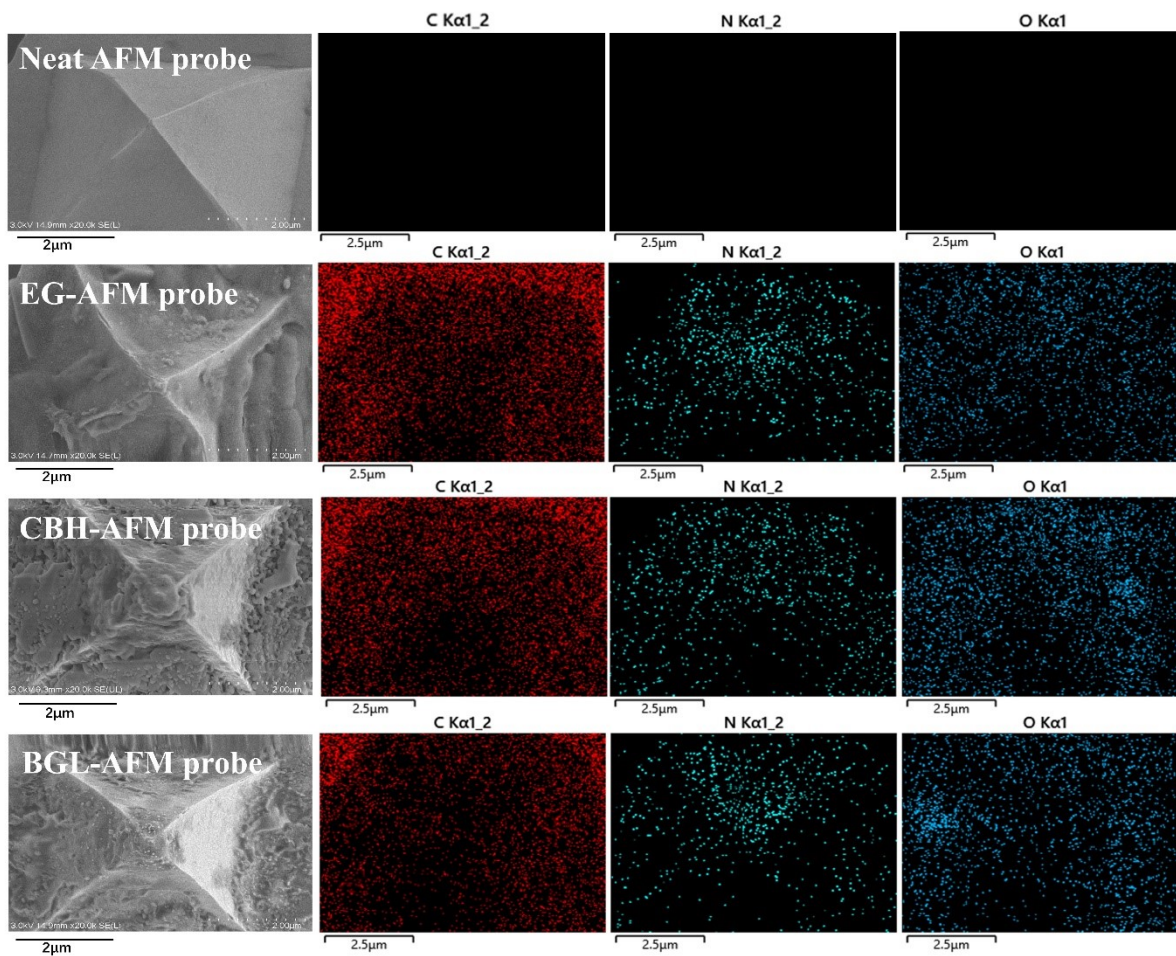

**Figure S2** FE-SEM analysis morphology of neat AFM probe and AFM probe modified by different enzymes of EG, CBH and BGL.

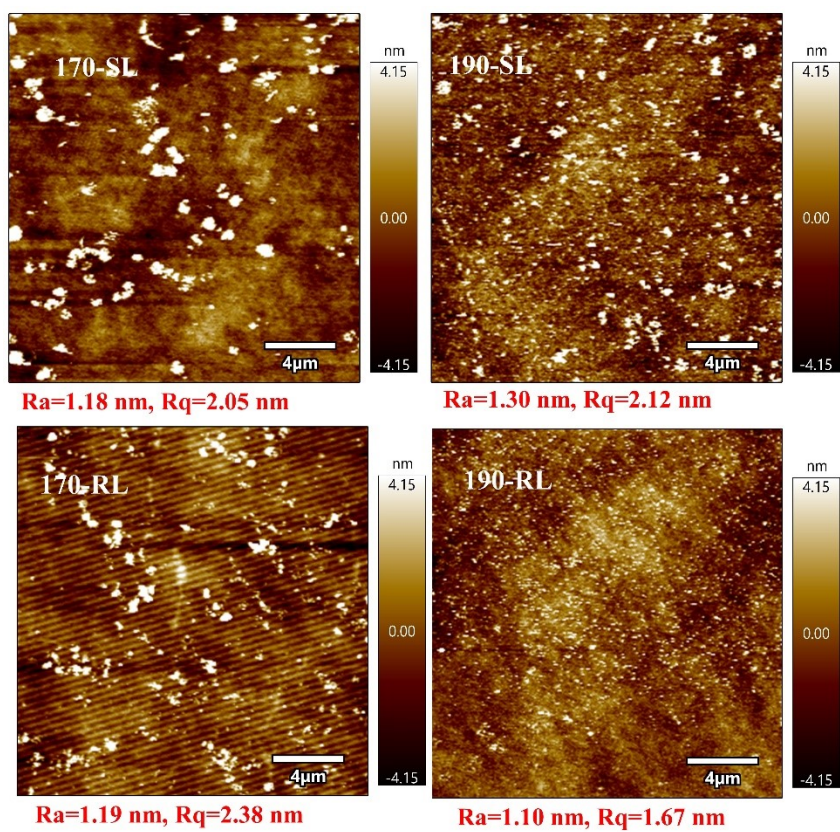

**Figure S3** AFM image of lignin film from 0.5% DMSO aqueous solution.

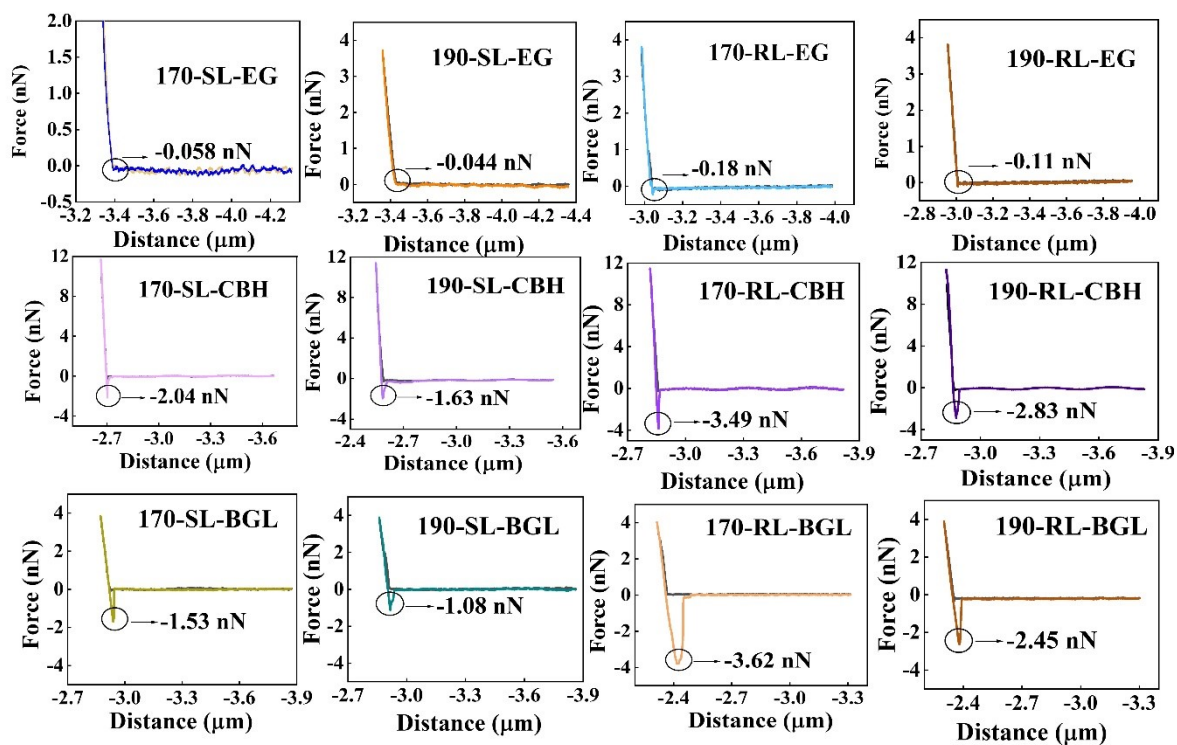

**Figure S4** The force-distance curve between SL, RL film and different functionalized AFM probes (EG, CBH, BGL enzymes).

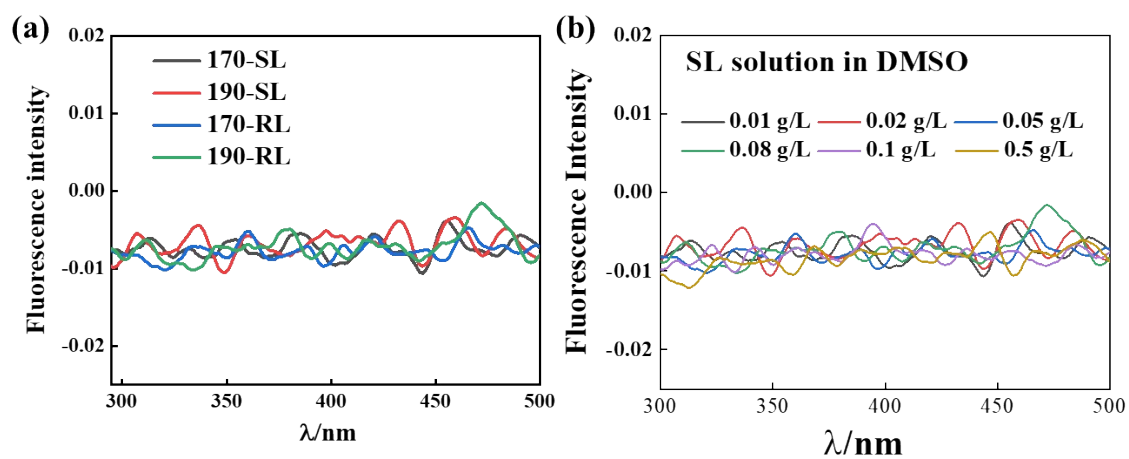

**Figure S5** (a): Fluorescence emission peaks of different lignin solutions at 280 nm excitation wavelength. (b): Fluorescence emission peaks of SL DMSO solutions with different concentrations at 280 nm excitation wavelength.

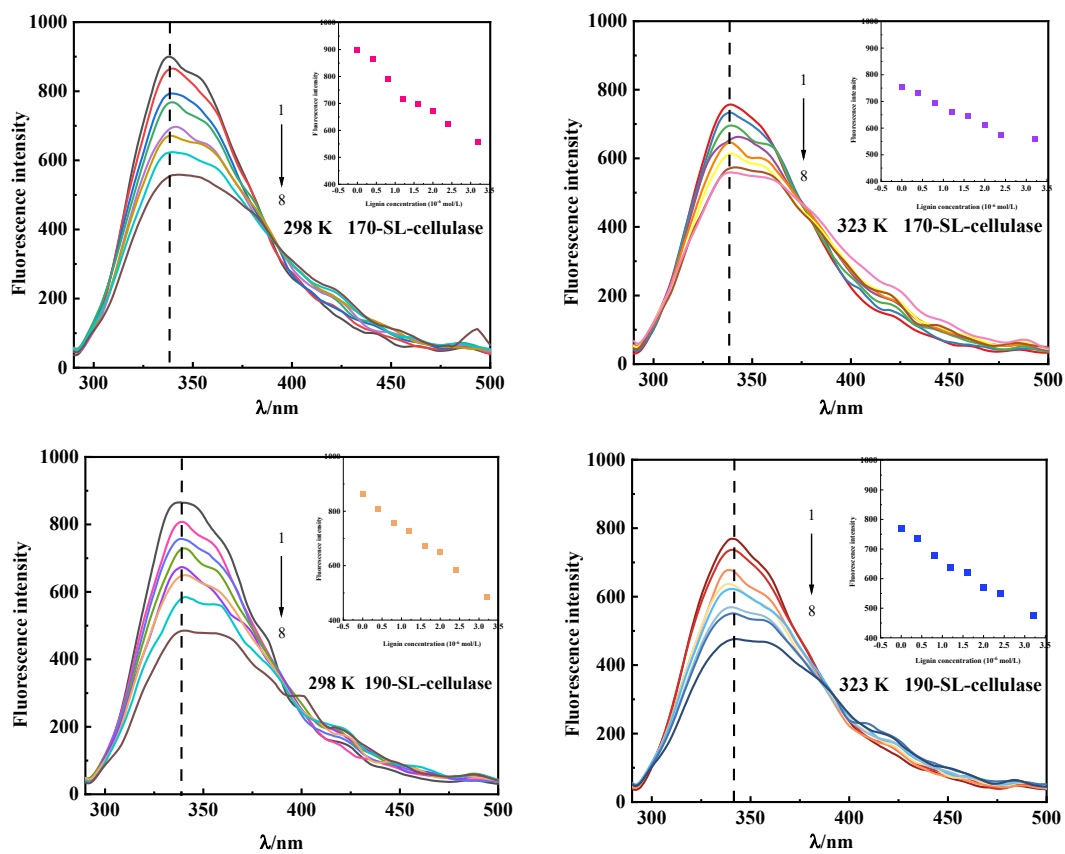

**Figure S6** Fluorescence emission spectra of cellulase at  $1 \times 10^{-6}$  mol/L titrated with different concentrations of SL at 298 K and 323 K.  $\lambda_{\text{ex}}=280$  nm,  $\lambda_{\text{em}}=300-500$  nm.



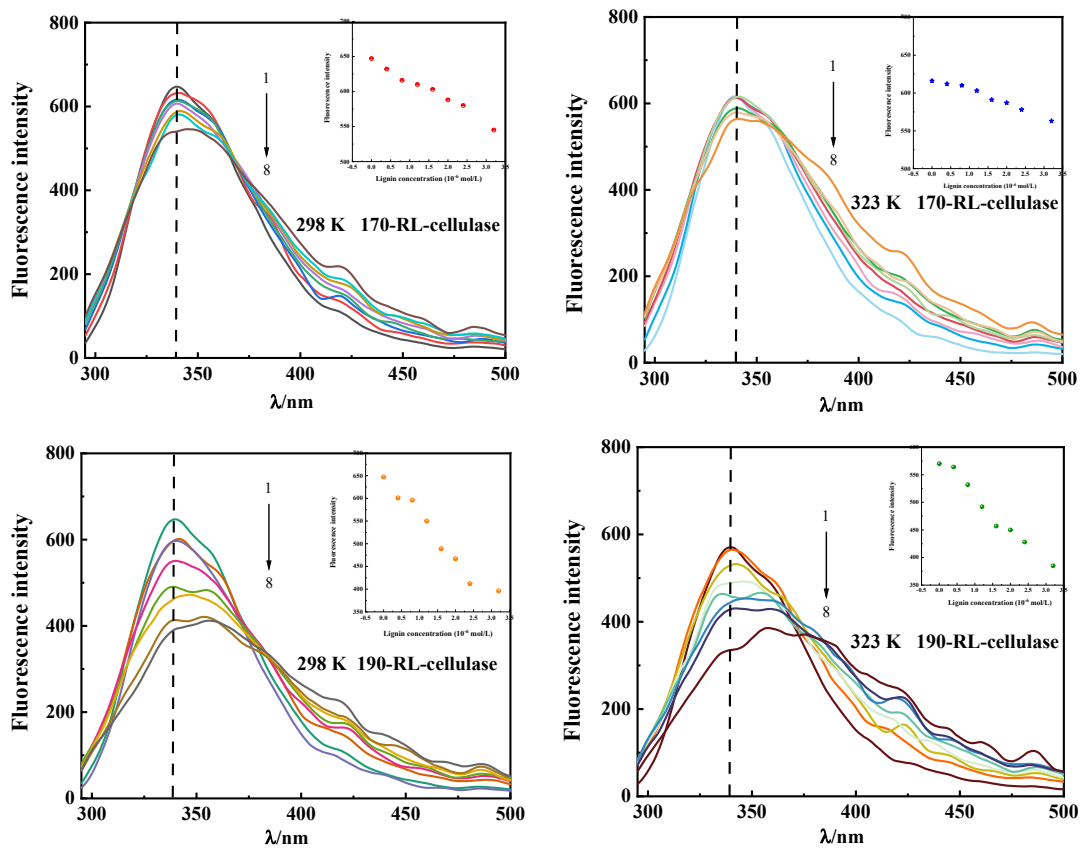

**Figure S7** Fluorescence emission spectra of cellulase at  $1 \times 10^{-6}$  mol/L titrated with different concentrations of RL at 298 K and 323 K.  $\lambda_{\text{ex}}=280$  nm,  $\lambda_{\text{em}}=300-500$  nm.

## References

1. J. R. Lakowicz, *Principles of fluorescence spectroscopy*, Springer, New York, 3rd ed., 2006.
2. S. Zhuang, H. Wang, K. Ding, J. Wang, L. Pan, Y. Lu, Q. Liu and C. Zhang, *Chemosphere*, 2016, **144**, 1050–1059.
3. P. D. Ross and S. Subramanian, *Biochemistry*, 1981, **20**, 3096–3102.
4. W. Norde, *Adv. Colloid Interface Sci.*, 1986, **25**, 267–340.
